# Supplementary material for: Trifunctional catalytic activities of trimetallic FeCoNi alloy nanoparticles embedded in a carbon shell for efficient overall water splitting
Source: Royal Society of Chemistry journal article supplement (doi:10.1039/c9ta13637a), 2020-01-01
Supplement: c9ta13637a1.pdf [file c9ta13637a1.pdf]

## **Supporting Information**

### **Trifunctional catalytic activities of trimetallic FeCoNi alloy nanoparticles embedded in carbon shell and for efficient overall water splitting**

**Mohd. Khalid<sup>a,\*</sup>, Ana M. B. Honorato<sup>b</sup>, Germano Tremiliosi Filho<sup>a</sup>, Hamilton Varela<sup>a</sup>**

*<sup>a</sup>Institute of Chemistry of São Carlos, University of São Paulo, POBox 780, 13560-970, São Carlos, SP, Brazil.*

*<sup>b</sup>Department of Materials Engineering, Federal University of Sao Carlos, Washington Luiz Rd, Km 235, BR1356590, Sao Carlos, SP, Brazil.*

\*Corresponding author's email: [mkansarister@gmail.com](mailto:mkansarister@gmail.com) (MK), [hamiltonvarela@usp.br](mailto:hamiltonvarela@usp.br) (HV)

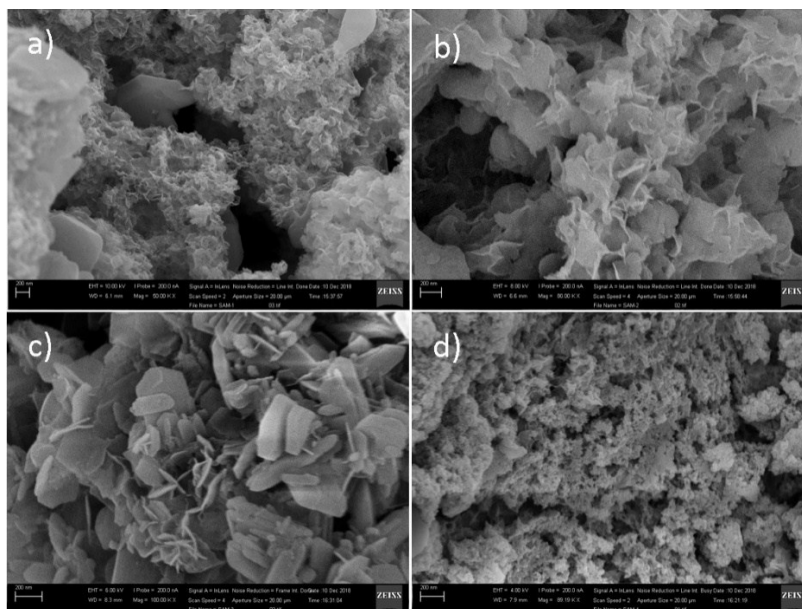

Fig. S1 SEM images of sample 1,2,3&4 before carbonization.

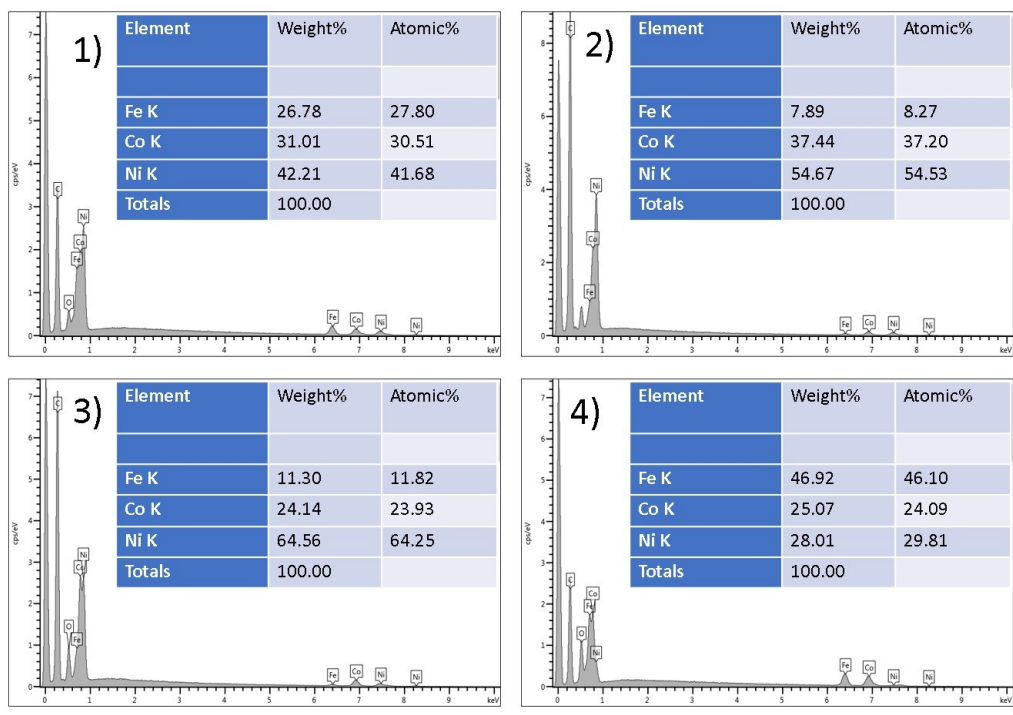

Fig. S2 EDX patterns and weight/atomic percentage of carbonized sample 1,2,3,&4.

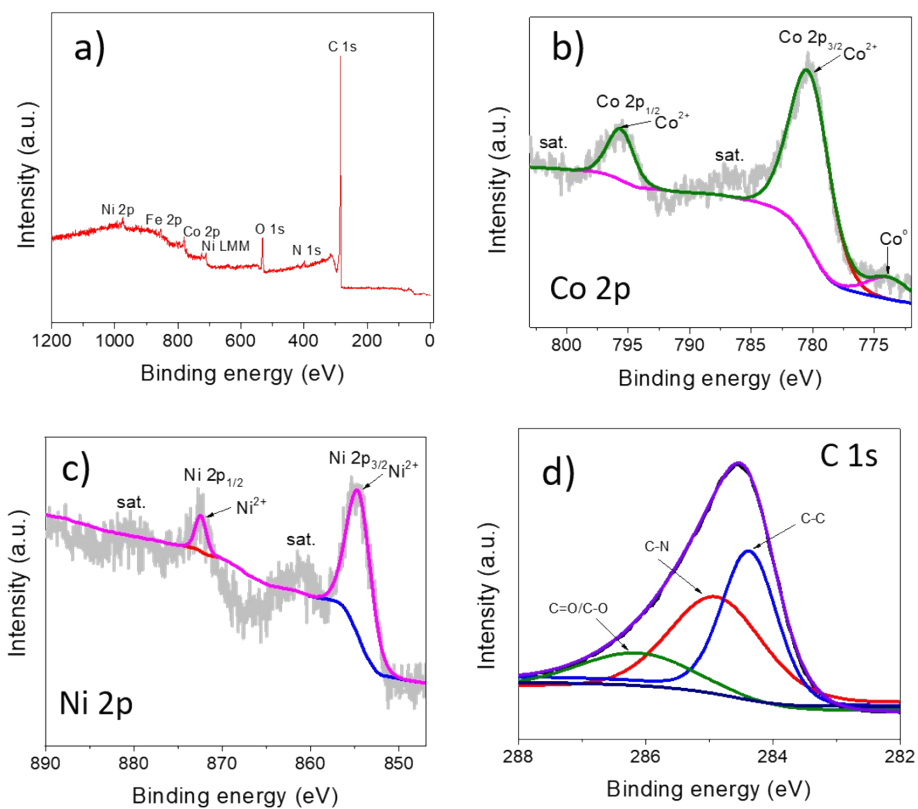

Fig. S3 a) XPS survey spectrum and b) XPS spectrum of Co 2p, c) XPS spectrum of Ni 2p, and d) XPS spectrum of C 1s for Fe<sub>1.0</sub>Co<sub>1.1</sub>Ni<sub>1.4</sub>-NC.

The calculated ECSAs of  $\text{Fe}_{1.0}\text{Co}_{2.0}\text{Ni}_{5.4}\text{-NC}$ ,  $\text{Fe}_{1.0}\text{Co}_{0.5}\text{Ni}_{0.6}\text{-NC}$ ,  $\text{Fe}_{1.0}\text{Co}_{1.1}\text{Ni}_{1.4}\text{-NC}$ ,  $\text{Fe}_{1.0}\text{Co}_{4.4}\text{Ni}_{6.5}\text{-NC}$ , and  $\text{RuO}_2$  were 0.38, 0.24, 0.16, 0.12, and  $0.03 \text{ cm}^2$ , respectively.

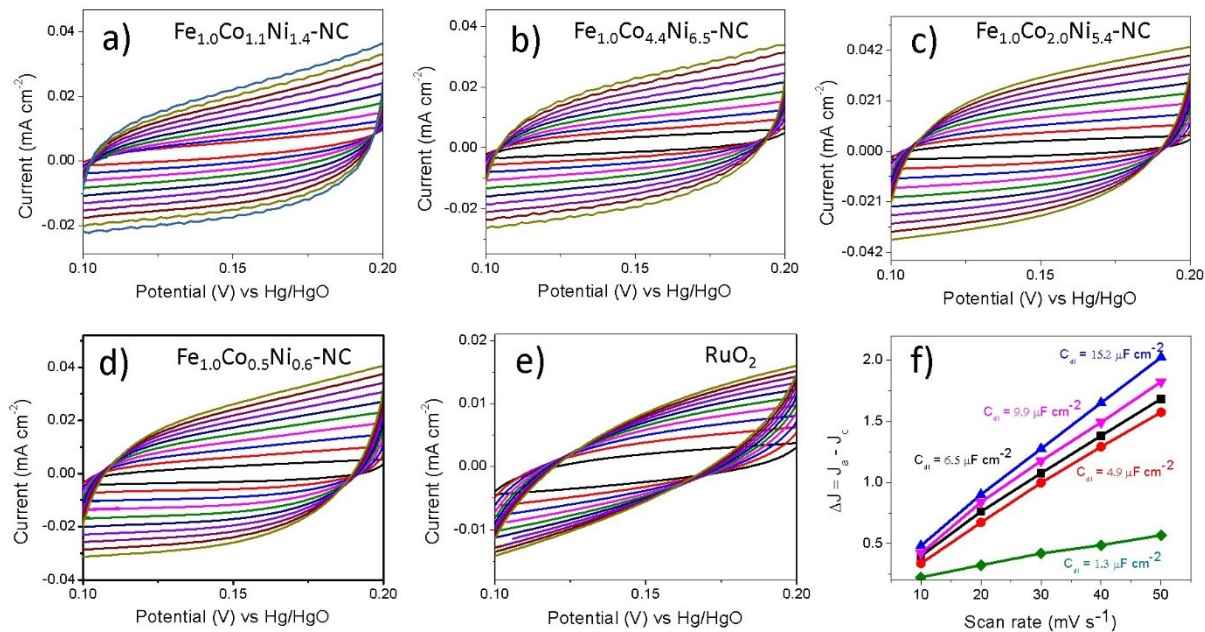

Fig. S4. Electrochemical active surface area. a) to d) CV cycles of pyrolyzed samples 1,2,3,&4 respectively, and f) Charging current density differences ( $\Delta j = j_a - j_b$ ) at an overpotential of 0.15 V plotted against scan rates to estimation  $C_{dl}$ .

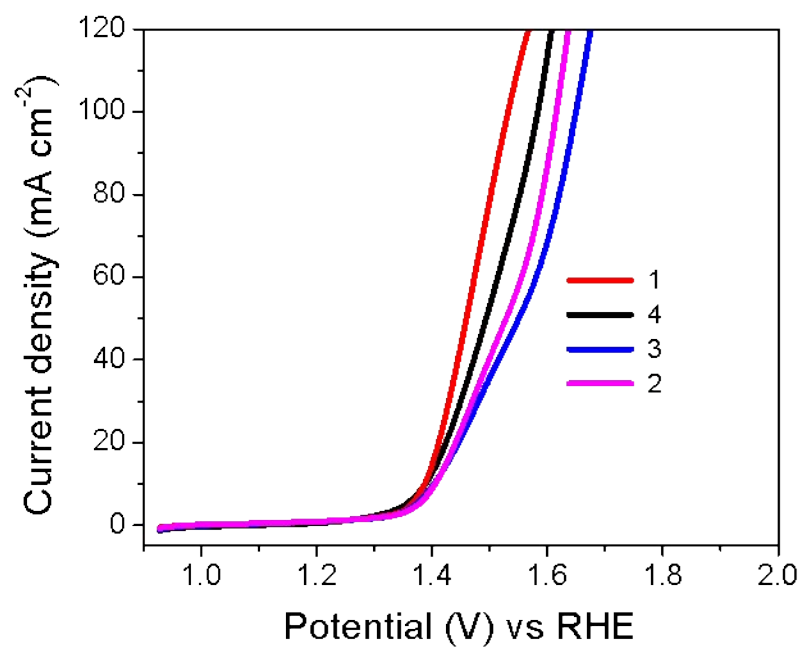

Fig. S5. EOR curves of 1 for  $\text{Fe}_{1.0}\text{Co}_{2.0}\text{Ni}_{5.4}\text{-NC}$ , 2 for  $\text{Fe}_{1.0}\text{Co}_{0.5}\text{Ni}_{0.6}\text{-NC}$ , 3 for  $\text{Fe}_{1.0}\text{Co}_{1.1}\text{Ni}_{1.4}\text{-NC}$ , 4 for  $\text{Fe}_{1.0}\text{Co}_{4.4}\text{Ni}_{6.5}\text{-NC}$  in 1 M KOH + 1 M  $\text{C}_2\text{H}_5\text{OH}$  electrolyte.

Table S1. Comparison of the OER electrocatalytic activities of Fe<sub>1.0</sub>Co<sub>1.1</sub>Ni<sub>1.4</sub>-NC with some lately reported non-noble based electrocatalysts.

| Catalysts                                                 | Overpotential at 10 mA cm <sup>-2</sup> (vs. RHE) | Mass loading mg cm <sup>-2</sup> | Electrolyte | References |
|-----------------------------------------------------------|---------------------------------------------------|----------------------------------|-------------|------------|
| Fe <sub>1.0</sub> Co <sub>1.1</sub> Ni <sub>1.4</sub> -NC | 270 mV                                            | ~ 0.025                          | 1 M KOH     | This work  |
| IrO <sub>2</sub>                                          | 338 mV                                            | 0.21                             | 1 M KOH     | S1         |
| RuO <sub>2</sub>                                          | 380 mV                                            | 0.146                            | 1 M KOH     | S2         |
| CoFe@NC/rGO                                               | 278 mV                                            | NA                               | 1 M KOH     | S3         |
| CoNi(OH) <sub>x</sub>                                     | 280 mV                                            | 0.72                             | 1 M KOH     | S4         |
| FeNi@Graphene                                             | 280 mV                                            | 0.32                             | 1 M NaOH    | S5         |
| Ni <sub>3</sub> FeN-NPs                                   | 280 mV                                            | 0.20                             | 1 M KOH     | S6         |
| NiFe LDH-NS                                               | 300 mV                                            | 0.07                             | 1 M KOH     | S1         |
| NiFe-SW                                                   | 240 mV                                            | NA                               | 1 M KOH     | S7         |
| NiCo <sub>2.7</sub> (OH) <sub>x</sub>                     | 350 mV                                            | 0.20                             | 1 M KOH     | S8         |
| FeCoNi-ATNs/NF                                            | 290 mV                                            | 0.016                            | 1 M KOH     | S9         |
| FeCoNi-ATNs (H)/NF                                        | 225 mV                                            | 0.016                            | 1 M KOH     |            |
| W <sub>0.5</sub> Co <sub>0.4</sub> Fe <sub>0.1</sub> /NF  | 310 mV                                            | NA                               | 1 M KOH     | S10        |
| Ni <sub>3</sub> Se <sub>2</sub> -GC                       | 290 mV                                            | 0.217                            | 0.3 M KOH   | S11        |
| N-NiMoO <sub>4</sub> /NiS <sub>2</sub>                    | 283 mV                                            | 0.2                              | 1 M KOH     | S12        |

Table S2. Turnover frequency (TOF) values of samples.

|                 | Fe <sub>1.0</sub> Co <sub>1.1</sub> Ni <sub>1.4</sub> -NC | Fe <sub>1.0</sub> Co <sub>4.4</sub> Ni <sub>6.5</sub> -NC | Fe <sub>1.0</sub> Co <sub>2.0</sub> Ni <sub>5.4</sub> -NC | Fe <sub>1.0</sub> Co <sub>0.5</sub> Ni <sub>0.6</sub> -NC | FeNi-NC                |
|-----------------|-----------------------------------------------------------|-----------------------------------------------------------|-----------------------------------------------------------|-----------------------------------------------------------|------------------------|
| <b>TOF@1.53</b> | 0.006 s <sup>-1</sup>                                     | 0.002 s <sup>-1</sup>                                     | 0.0027 s <sup>-1</sup>                                    | 0.0059 s <sup>-1</sup>                                    | 0.0038 s <sup>-1</sup> |

Table S3. Comparison of the HER electrocatalytic activities of Fe<sub>1.0</sub>Co<sub>1.1</sub>Ni<sub>1.4</sub>-NC with some lately reported non-noble based electrocatalysts

| Catalysts                                                 | Overpotential at 10 mA cm <sup>-2</sup> (vs. RHE) | Mass loading mg cm <sup>-2</sup> | Electrolyte | References |
|-----------------------------------------------------------|---------------------------------------------------|----------------------------------|-------------|------------|
| Fe <sub>1.0</sub> Co <sub>1.1</sub> Ni <sub>1.4</sub> -NC | 175 mV                                            | ~0.025                           | 1 M KOH     | This work  |
| Co(OH) <sub>2</sub> /Pt(111)                              | 248 mV                                            | NA                               | 1 M KOH     | S13        |
| NiFe LDH/NF                                               | 210 mV                                            | NA                               | 1 M KOH     | S14        |
| NiFe-MOF                                                  | 196 mV                                            | NA                               | 1 M KOH     | S15        |
| CoP/CC                                                    | 209 mV                                            | 0.92                             | 1 M KOH     | S16        |
| NiFeOx/CFP                                                | 88 mV                                             | 1.6                              | 1 M NaOH    | S17        |
| NiCoP/rGO                                                 | 270 mV                                            | 0.15                             | 1 M KOH     | S18        |
| CuCo@NC                                                   | 145 mV                                            | 0.182                            | 1 M KOH     | S19        |
| NiFeV-LDHs/NF                                             | 125 mV                                            | NA                               | 1 M KOH     | S20        |
| CoSe/NiFe LDH                                             | 260 mV                                            | 4                                | 1 M KOH     | S21        |
| MoS <sub>2</sub> /Ni <sub>2</sub> S <sub>3</sub>          | 110 mV                                            | 9.7                              | 1 M KOH     | S22        |
| Ni <sub>3</sub> FeN-NPs                                   | 158 mV                                            | 0.2                              | 1 M KOH     | S6         |

### Supporting References:

S1 F. Song, X. Hu, *Nat Commun.* 2014, **5**, 4477.

S2 T. Sun, J. Wang, C. Qiu, X. Ling, B. Tian, W. Chen, C. Su, *Adv. Sci.* 2018, **5**, 1800036.

S3 F. Kong, K. Chen, S. Song, D. Xue, *Inorg. Chem. Front.* 2018, **5**, 1962.

S4 S. Li, Y. Wang, S. Peng, L. Zhang, A. M. Al-Enizi, H. Zhang, X. Sun, G. Zheng, *Adv. Energy Mater.* 2016, **6**, 1501661.

S5 X. Cui, P. Ren, D. Deng, J. Deng, X. Bao, *Ener. Envir. Sci.* 2016, **9**, 123.

S6 X. Jia, Y. Zhao, G. Chen, L. Shang, R. Shi, X. Kang, G. I. N. Wterhouse, L.-Z. Wu, C.-H. Tung, T. Zhang, *Adv. Ener. Mater.* 2016, **6**, 1502585.

S7 W. Zhang, Y. Wu, J. Qi, M. Chen, R. Cao, *Adv. Energy Mater.* 2017, **7**, 1602547.



- S8 J. Nai, H. Yin, T. You, L. Zheng, J. Zhang, P. Wang, Z. Jin, Y. Tian, J. Liu, Z. Tang, L. Guo, *Adv. Energy Mater.* 2015, **5**, 1401880.
- S9 Q. Zhang, N. M. Bedford, J. Pan, X. Lu, R. Amal, *Adv. Energy Mater.* 2019, 1901312.
- S10 Q. Shao, P. Wang, F. Lv, S. Guo, J. Guo, X. Huang, *Angew. Chem. Int. Ed.* 2017, **56**, 45024506.
- S11 A. T. Swesi, J. Masud, M. Nath, *Energy Environ. Sci.* 2016, **9**, 1771.
- S12 L. An, J. Feng, Y. Zhang, R. Wang, H. Liu, G.-C. Wang, F. Cheng, P. Xi, *Adv. Funct. Mater.* 2019, **29**, 1805298.
- S13 R. Subbaraman, D. Tripkovic, K.-C. Chang, D. Strmcnik, A. P. Paulikas, P. Hirunsit, M. Chan, J. Greeley, V. Stamenkovic, N. M. Markovi, *Nat. Mater.* 2012, **11**, 550.
- S14 J. Luo, J. H. Im, M. T. Mayer, M. Schreier, M. K. Nazeeruddin, N. G. Park, S. D. Tilley, H. J. Fan, M. Grätzel, *Science* 2014, **345**, 1593.
- S15 J. Duan, S. Chen, C. Zhao, *Nat. Commun.* 2017, **8**, 15341.
- S16 J. Tian, Q. Liu, A. M. Asiri, X. Sun, *J. Am. Chem. Soc.* 2014, **136**, 7587.
- S17 H. Wang, H.-W. Lee, Y. Deng, Z. Lu, P.-C. Hsu, Y. Liu, D. Lin, Y. Cui, *Nat. Commun.* 2015, **6**, 7261.
- S18 J. Li, M. Yan, X. Zhou, Z.-Q. Huang, Z. Xia, C.-R. Chang, Y. Ma, Y. Qu, *Adv. Funct. Mater.* 2016, **26**, 6785.
- S19 M. Kuang, Q. Wang, P. Han, G. Zheng, *Adv. Ener. Mater.* 2017, **7**, 1700193.
- S20 K. N. Dinh, P. Zheng, Z. Dai, Y. Zhang, R. Dangol, Y. Zheng, B. Li, Y. Zong, Q. Yan, *Small* 2017, **14**, 1703257.
- S21 Y. Hou, M. R. Lohe, J. Zhang, S. Liu, X. Zhuang, X. Feng, *Energy Environ. Sci.* 2016, **9**, 478.
- S22 J. Zhang, T. Wang, D. Pohl, B. Rellinghaus, R. Dong, S. Liu, X. Zhuang, X. Feng, *Angew. Chem. Int. Ed.* 2016, **128**, 6814.
